# Supplementary material
Source: PubMed Central journal article supplement (PMC5004639)
Supplement: ASN.2015030318SupplementaryData.pdf [file ASN.2015030318SupplementaryData.pdf]

**Supplementary information**

***TRPC6* G757D loss-of-function mutation associated with  
focal segmental glomerulosclerosis**

Marc Riehle, Anja K. Büscher, Björn-Oliver Gohlke, Mario Kaßmann,  
Maria Kolatsi-Joannou, Jan H. Bräsen, Mato Nagel, Jan Ulrich Becker, Paul Winyard,  
Peter Friedrich Hoyer, Robert Preissner, Dietmar Krautwurst, Maik Gollasch, Stefanie Weber,  
Christian Harteneck

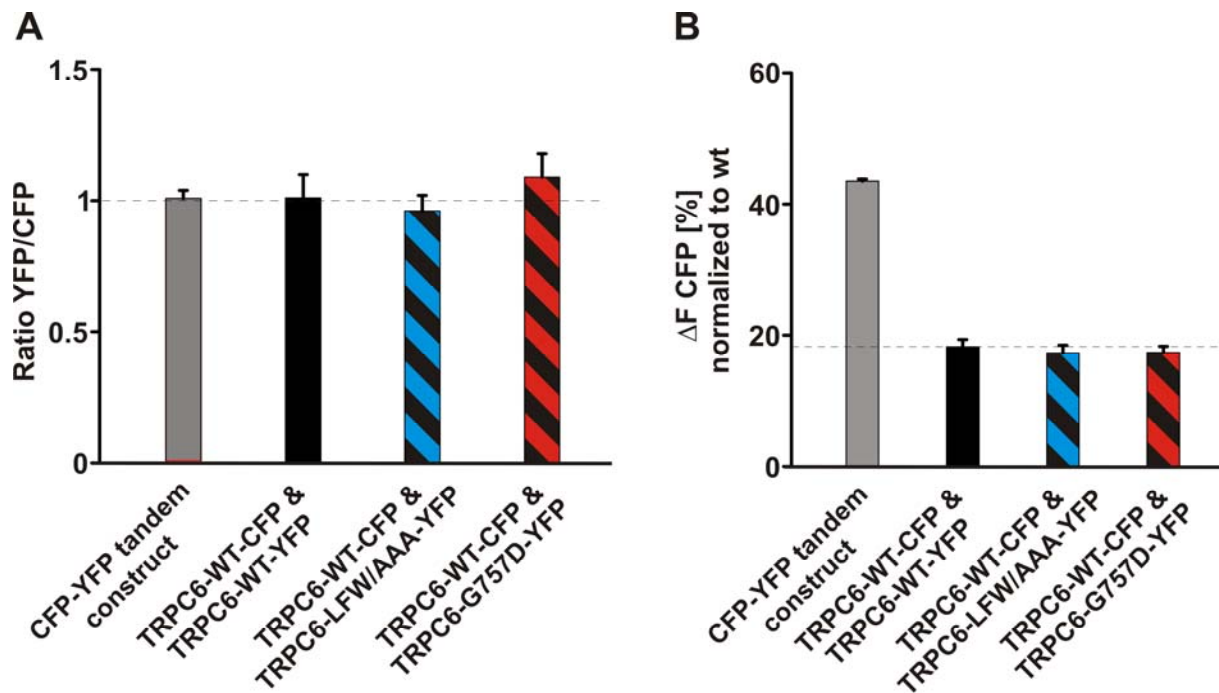

**Figure S1. Optimization of fluorophore expression and fluorescence resonance energy transfer (FRET) measurements.** (A) The expression ratio of TRPC6-WT-CFP and TRPC6-WT or G757D or LFW678-680AAA-YFP were optimized and iteratively adjusted by measuring the fluorescence of both fluorophores (CFP vs. YFP) as described in Method section. Shortly, fluorescent values of the fluorophores fused to TRPC6 protein were measured and compared with the fluorescence values of an intramolecularly fused CFP-YFP tandem protein allowing quantification of both expressed TRPC6 fusion proteins. With a cDNA-ratio of 1.5 g plasmid DNA coding for the CFP variant to 1 g plasmid DNA coding for the YFP variant, we obtained a ratio of fluorescence values indistinguishable from the tandem protein. Statistical analysis revealed no significant differences. Data are means  $\pm$  SEM of at least two independent experiments representing in total 357 (CFP-YFP-Tandem), 78 (TRPC6 WT), 76 (TRPC6 G757D), 137 (LFW678-680AAA) transfected cells.

(B) FRET efficiencies as measure of the vicinity and interaction of proteins were measured in co-transfected HEK293 expressing TRPC6-WT (C-terminally fused to CFP) and TRPC6 WT, TRPC6 LFW678-680AAA (LFW/AAA) or TRPC6 G757D (each C-terminally fused to YFP). Statistical analysis revealed no significant differences; the values of TRPC6WT-CFP & TRPC6-WT-YFP correspond to published values (Hofmann et al., PNAS 2002). Data are means  $\pm$  SEM of at least three independent experiments representing in total 247 (CFP-YFP-Tandem), 87 (WT / 1:1), 113 (G757D & WT / 1:1), 59 (LFW/AAA & WT / 1:1) transfected cells

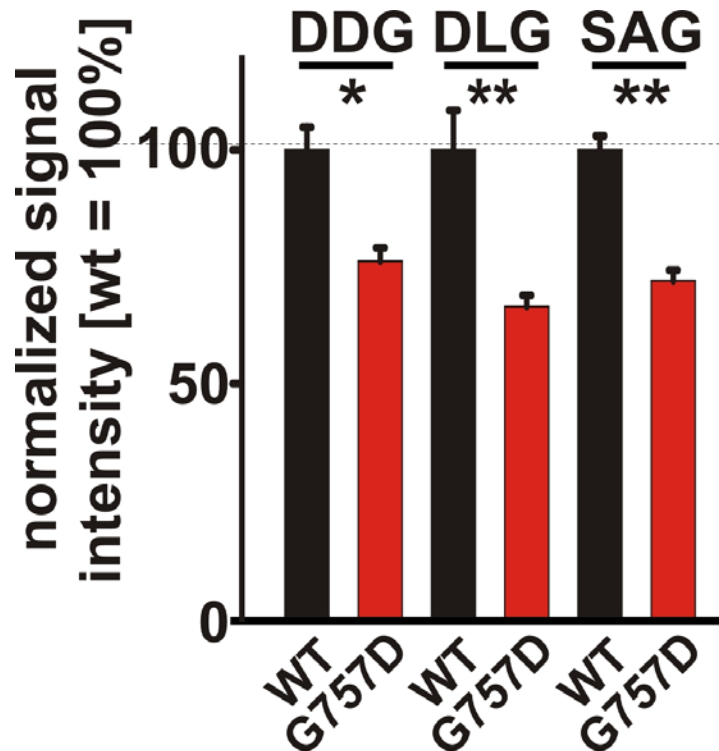

**Figure S2. Effect of diacylglycerol analogues on WT TRPC6 and TRPC6 G757D  $\text{Ca}^{2+}$  entry.**

Response to different diacylglycerol analogues were measured in TRPC6 WT and TRPC6 G757D expressing HEK293 cells. Statistical analysis of data obtained during at least three independent experiments is presented as bar graphs. The graph shows the responses of the cells after application of 1,2-Didecanoyl-*sn*-glycerol (DDG): 536 and 715 (WT/G757D) cells; 1,2-Dilauroyl-*sn*-glycerol (DLG): 581 and 623 (WT/G757D) cells; 1-Stearyl-2-Arachidonoyl-*sn*-glycerol (SAG): 459 and 581 (WT/G757D) cells. The amplitudes were determined as difference between peak and baseline  $\text{Ca}^{2+}$  levels relative to WT TRPC6 signals (\*\*\*)  $P \leq 0.001$ ).

**Table S1. Oligonucleotides used for site-directed mutagenesis**

| Mutation     | direction | sequence                                                                    |
|--------------|-----------|-----------------------------------------------------------------------------|
| 85_88dupAYMF | sense     | aggtagctaatcgaggaccagcatacatgtttGCATACATGTTTagtg<br>atcgctccacaagcctatctata |
| 85_88dupAYMF | antisense | tagataggcttgggagcgatcactAAACATGTATGCaaaca<br>tgtatgctggctcgcattagctaacctt   |
| G109S        | sense     | cttttgatgcagctgaatatTCGaacatcccagtggtgcggaagat                              |
| G109S        | antisense | atctccgcaccactgggatgtCGAatattcagctgcatccaaaaag                              |
| N110H        | sense     | cttttgatgcagctgaatatggtCacatcccagtggtgcggaagatgtt                           |
| N110H        | antisense | aacatctccgcaccactgggatgtGaccatattcagctgcatccaaaaag                          |
| P112Q        | sense     | cttttgatgcagctgaatatggtaaTatTcAagtggcggaagatgttagaaga                       |
| P112Q        | antisense | tcttctaacatctccgcaccactTgAatAttaccatattcagctgcatccaaaaag                    |
| N125S        | sense     | ttagaagaatgccactcactcaGcgtaactgtgtggattacatg                                |
| N125S        | antisense | catgtaatccacacagtaacgCtgagtgagtggcattcttctaa                                |
| M132T        | sense     | caacgtaactgtgtggattacaCCggTcagaatgccctacagttggcagt                          |
| M132T        | antisense | actccaactgtagggcattctgAccGGtgtaatccacacagtaacgttg                           |
| N143S        | sense     | gccctacagttggcagtggcTaGCgagcatctggaaattacaga                                |
| N143S        | antisense | tctgtaattccagatgctcGCtAgccactgccaactgtagggc                                 |
| R175Q        | sense     | ctagctattagtaaaggttatgttcAgattgtggaagcaattctcagcat                          |
| R175Q        | antisense | atgactgagaattgctccacaatcTgaacataaccttactaatagctag                           |
| H218L        | sense     | gatgaagatgggacacggttctcccTtgatgtgactccaatcattctggct                         |
| H218L        | antisense | agccagaatgattggagtcacatcaAgggagaaccgtgtcccatcttcac                          |
| S270T        | sense     | cagaagcatgactgtttagccacAcGCgTtctaggattaatgcctataaaggcc                      |
| S270T        | antisense | ggcctttataggcattaatcctagaAcGCgTgtggctaaacgagtcagctctctg                     |
| R360H        | sense     | gaaacgctccagatgggatcaTggCcAcccaaatctcagccgtttaaact                          |
| R360H        | antisense | agttttaaacggctgagattgggTgGccAtgatcaccactctggagcgttct                        |

TRPC6 mutations in FSGS

|               |           |                                                                                   |
|---------------|-----------|-----------------------------------------------------------------------------------|
| L395A         | sense     | acttctctccatttggatgagaatGCttctggtttacgacagcagacaatgg                              |
| L395A         | antisense | ccattgtctgctgtcgtaaaccagaaGCattctcatacctaatggagagaagt                             |
| A404V         | sense     | tctggtttacgacagcagacaatggTggcaagttccttgtggccttgc                                  |
| A404V         | antisense | agcaaggaccacaaggaacttgaccAccattgtctgctgtcgtaaaccaga                               |
| G757D         | sense     | tctggttttctactttgaggaggAcagaacacttctgtacccttcaatct                                |
| G757D         | antisense | ttgaagggtacaggaagtgttctgTcctcctcaaagtaggaaaaccagagtt                              |
| L780P         | sense     | ctgtttatcttactgaagcCtaaaaaatggatttctgagctgtt                                      |
| L780P         | antisense | aacagctcagaaatccatttttaGgcttcagtaagagataaaaacag                                   |
| Q889K         | sense     | aggggaactgaaggaaattaagAaggaTatctcaagtctccgctatgaact                               |
| Q889K         | antisense | agttcatagcggagacttgagatAtcctTcttaatttcttcagttcccct                                |
| R895C         | sense     | gcaggacatctcaagtctcTgctatgaactccttgaaga                                           |
| R895C         | antisense | tcttcaaggagttcatagcAgagacttgagatgtcctgc                                           |
| R895L         | sense     | attaagcaggacatctcaagtctccTctatgaactccttgaagaaaaatct                               |
| R895L         | antisense | agatttttcttcaaggagttcatagAggagacttgagatgtcctgcttaat                               |
| E897K         | sense     | gcaggacatctcaagtctccgctatAaGctTcttgaagaaaaatctcagaatacag                          |
| E897K         | antisense | ctgtattctgagatttttctcaagAagCtTatagcggagacttgagatgtcctgc                           |
| EE755/756KK   | sense     | gggccaactctggttttctactttAagAagggcagaacacttctgtacccttca                            |
| EE755/756KK   | antisense | tgaagggtacaggaagtgttctgcctTctTaaagtaggaaaaccagagtttgccc                           |
| EEG755-757KKR | sense     | ggccaactctggttttctactttAagAagCgcagaacacttctgtacccttcaa                            |
| EEG755-757KKR | antisense | ttgaagggtacaggaagtgttctgcGctTctTaaagtaggaaaaccagagtttgccc                         |
| KK826/827EE   | sense     | gaagaccttcaaaattatcacttgacGaaGaacaggttgggcacaataaacaacca                          |
| KK826/827EE   | antisense | tggtgtttattgtgccaacctgttCttCgtcaagtataatgtgaaaggtcttc                             |
| LFW678-680AAA | sense     | cttcacaacagttgaagagagtttaagacaGCTGCcGCggctatattggacttt<br>ctgaagtgaaatcagtggtcatc |
| LFW678-680AAA | antisense | gatgaccactgatttcacttcagaaagtccaaatatagccGCgGCAGCtgtctt<br>aaaactcttcaactgttgaag   |
